# Supplementary material for: Metagenomic Sequencing of Lloviu Virus from Dead Schreiber’s Bats in Bosnia and Herzegovina
Source: MDPI journal article supplement (doi:10.3390/microorganisms11122892), 2023-11-30
Supplement: s1 [file s1]

# Supplementary Material - Metagenomic sequencing of Lloviu virus from dead bats in Bosnia and Herzegovina

**Table S1.** Information about NCBI sequences used for phylogenetic analysis.

| Sequence name                                                                                                                                   | NCBI Accession number | Submission date |
|-------------------------------------------------------------------------------------------------------------------------------------------------|-----------------------|-----------------|
| Orthomarburgvirus marburgense isolate MV-22-114C/Ghana/2022, complete genome                                                                    | OQ672471.1            | 26-JUL-2023     |
| Cuevavirus lloviuense isolate Hungary/2019/378, complete genome                                                                                 | OQ630505.1            | 02-JUL-2023     |
| Lloviu cuevavirus isolate Italy/2021, complete genome                                                                                           | ON186772.1            | 29-JAN-2023     |
| Lloviu cuevavirus isolate Hungary/2019/378, complete genome                                                                                     | MZ541881.1            | 15-FEB-2022     |
| Lloviu cuevavirus strain LLOV_378 nucleoprotein, VP35, VP40, GP1, GP2, VP30, hypothetical protein, VP24, and RNA polymerase genes, complete cds | MW775011.1            | 14-FEB-2022     |
| Lloviu cuevavirus isolate Lloviu virus/M.schreibersii-wt/ESP/2003/Asturias-Bat86, complete genome                                               | NC_016144.1           | 13-AUG-2018     |
| Lloviu virus strain MS-Liver-86/2003, complete genome                                                                                           | JF828358.1            | 30-OCT-2011     |
